# Supplementary material for: 454 Pyrosequencing to Describe Microbial Eukaryotic Community Composition, Diversity and Relative Abundance: A Test for Marine Haptophytes
Source: PubMed Central journal article supplement (PMC3771978; doi:10.1371/journal.pone.0074371), 2013-09-12
Supplement: pone.0074371.s001.pdf [file pone.0074371.s001.pdf]

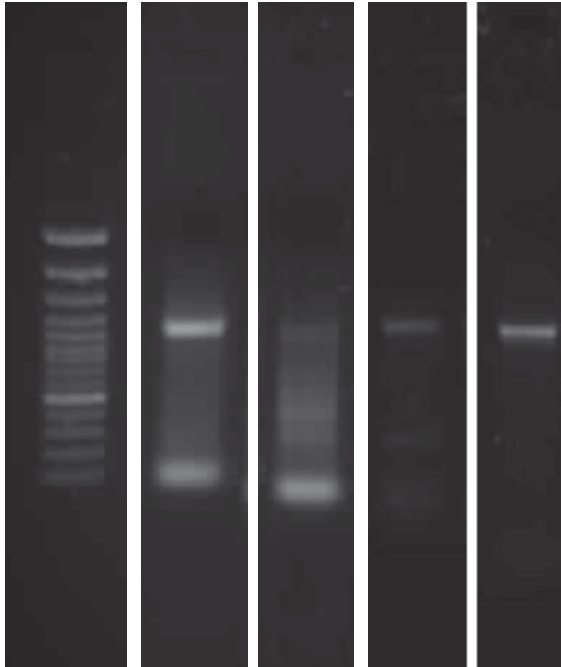

**Figure S1. Agarose gel loaded with PCR products for clone libraries.**

From left to right: Ladder (O'GeneRuler 100bp plus, Fermentas), template cDNA-bb (from RNA extracted without bead-beater), cDNA+bb (from RNA extracted with bead-beater), DNA-bb (DNA extracted without bead-beater), DNA+bb (DNA extracted with bead-beater).
